# Supplementary material for: New strong extrafunctionalizable tris(3,4-HP) and bis(3,4-HP) metal sequestering agents: synthesis, solution and in vivo metal chelation
Source: Royal Society of Chemistry journal article supplement (doi:10.1039/c9dt02905b), 2019-01-01
Supplement: c9dt02905b1.pdf [file c9dt02905b1.pdf]

## **New strong extrafunctionalizable tris(3,4-HP) and bis(3,4-HP) metal sequestering agents. Synthesis, solution and *in vivo* metal chelation**

**Valeria M. Nurchi,<sup>\*a</sup> Rosita Cappai,<sup>a,b</sup> Karam Chand,<sup>b</sup> Silvia Chaves,<sup>b</sup> Lurdes Gano,<sup>c</sup> Guido Crisponi,<sup>a</sup> Massimiliano Peana,<sup>d</sup> M. Antonietta Zoroddu,<sup>d</sup> M. Amélia Santos<sup>\*b</sup>**

<sup>a</sup> Dipartimento di Scienze della Vita e dell' Ambiente, Università di Cagliari, Cittadella Universitaria, 09042, Monserrato-Cagliari (Italy)

<sup>b</sup> Centro de Química Estrutural, Instituto Superior Técnico, Universidade de Lisboa, Av, Rovisco Pais 1, 1049-001, Lisboa (Portugal)

<sup>c</sup> Centro de Ciências e Tecnologias Nucleares(C2TN), Instituto Superior Técnico, Universidade de Lisboa, Estrada Nacional 10, 2695-006, Lisboa (Portugal)

<sup>d</sup> Dipartimento di Chimica e Farmacia, Università di Sassari, Via Vienna 2, 07100, Sassari (Italy)

Corresponding authors:

Prof. Valeria M. Nurchi, Dipartimento di Scienze della Vita e dell' Ambiente, Università di Cagliari, Cittadella Universitaria, 09042, Monserrato-Cagliari, Italy, E-mail [nurchi@unica.it](mailto:nurchi@unica.it), Fax: +39 0706754478

Prof. M. Amélia Santos, Centro de Química Estrutural, Instituto Superior Técnico, Universidade de Lisboa, Av, Rovisco Pais 1, 1049-001, Lisboa, Portugal, E-mail [masantos@ist.utl.pt](mailto:masantos@ist.utl.pt), Fax: +351 218464455

## **SUPPLEMENTARY INFORMATION**

**Table 1S.**  $^1\text{H}$  and  $^{13}\text{C}$  NMR titration of KC18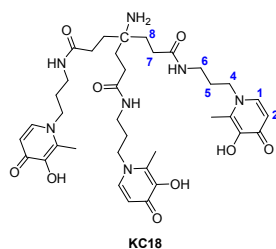 $^1\text{H}$  Chemical shifts (ppm) of KC18 ligand vs pH

|       | HN    | 2     | 1     | 4     | 6     | 3     | 7 e 8 | 5     |
|-------|-------|-------|-------|-------|-------|-------|-------|-------|
| 1.61  | 8.050 | 7.948 | 7.021 | 4.265 | 3.181 | 2.488 | 2.136 | 1.970 |
| 2.01  | 8.052 | 7.942 | 7.005 | 4.261 | 3.177 | 2.486 | 2.139 | 1.973 |
| 2.38  | 8.042 | 7.890 | 6.928 | 4.224 | 3.176 | 2.461 | 2.133 | 1.956 |
| 2.60  | 8.037 | 7.862 | 6.884 | 4.203 | 3.174 | 2.447 | 2.131 | 1.948 |
| 2.80  | 8.030 | 7.815 | 6.820 | 4.175 | 3.167 | 2.427 | 2.127 | 1.938 |
| 3.00  | 8.029 | 7.800 | 6.796 | 4.168 | 3.167 | 2.422 | 2.129 | 1.935 |
| 3.28  | 8.021 | 7.733 | 6.693 | 4.120 | 3.155 | 2.389 | 2.124 | 1.918 |
| 3.58  | 8.017 | 7.686 | 6.652 | 4.168 | 3.150 | 2.368 | 2.121 | 1.907 |
| 4.00  | 8.014 | 7.651 | 6.576 | 4.074 | 3.148 | 2.359 | 2.118 | 1.903 |
| 4.53  | 8.013 | 7.577 | 6.463 | 4.028 | 3.147 | 2.328 | 2.119 | 1.884 |
| 4.80  | 8.011 | 7.589 | 6.475 | 4.027 | 3.139 | 2.328 | 2.114 | 1.883 |
| 5.10  | 8.009 | 7.553 | 6.426 | 4.010 | 3.137 | 2.317 | 2.112 | 1.877 |
| 5.23  | 8.010 | 7.549 | 6.422 | 4.008 | 3.136 | 2.316 | 2.112 | 1.875 |
| 5.30  | 8.009 | 7.540 | 6.407 | 4.005 | 3.136 | 2.315 | 2.112 | 1.874 |
| 5.50  | 8.009 | 7.542 | 6.412 | 4.004 | 3.142 | 2.314 | 2.115 | 1.874 |
| 6.10  | 8.008 | 7.534 | 6.403 | 3.998 | 3.132 | 2.309 | 2.109 | 1.870 |
| 6.50  | 8.007 | 7.534 | 6.404 | 4.000 | 3.138 | 2.311 | 2.113 | 1.872 |
| 7.20  | 8.006 | 7.535 | 6.404 | 4.000 | 3.134 | 2.309 | 2.110 | 1.873 |
| 7.89  | 8.012 | 7.525 | 6.399 | 3.998 | 3.138 | 2.309 | 2.111 | 1.873 |
| 8.21  | 8.008 | 7.530 | 6.401 | 3.999 | 3.136 | 2.308 | 2.108 | 1.870 |
| 8.50  | 8.010 | 7.530 | 6.401 | 3.999 | 3.138 | 2.310 | 2.112 | 1.871 |
| 8.77  | 8.010 | 7.519 | 6.397 | 4.000 | 3.140 | 2.310 | 2.115 | 1.873 |
| 8.87  | 8.008 | 7.511 | 6.392 | 3.997 | 3.138 | 2.306 | 2.111 | 1.870 |
| 9.12  | 7.997 | 7.500 | 6.389 | 3.997 | 3.138 | 2.305 | 2.112 | 1.871 |
| 9.31  |       | 7.483 | 6.381 | 3.992 | 3.135 | 2.301 | 2.110 | 1.867 |
| 9.40  |       | 7.482 | 6.381 | 3.995 | 3.138 | 2.303 | 2.115 | 1.871 |
| 9.55  |       | 7.470 | 6.377 | 3.994 | 3.137 | 2.302 | 2.117 | 1.871 |
| 9.80  |       | 7.419 | 6.353 | 3.982 | 3.131 | 2.291 | 2.117 | 1.864 |
| 9.95  |       | 7.414 | 6.352 | 3.983 | 3.132 | 2.292 | 2.117 | 1.866 |
| 10.03 |       | 7.395 | 6.344 | 3.981 | 3.131 | 2.289 | 2.119 | 1.866 |
| 10.20 |       | 7.337 | 6.319 | 3.971 | 3.127 | 2.280 | 2.127 | 1.862 |
| 10.50 |       | 7.322 | 6.312 | 3.969 | 3.127 | 2.276 | 2.123 | 1.862 |
| 10.74 |       | 7.336 | 6.319 | 3.972 | 3.127 | 2.279 | 2.122 | 1.862 |
| 11.00 |       | 7.301 | 6.304 | 3.965 | 3.124 | 2.274 | 2.125 | 1.860 |

<sup>13</sup> C shifts (ppm) of KC18 ligand vs pH

| <b>pH</b>    | <b>2</b> | <b>1</b> | <b>4</b> | <b>6</b> | <b>3</b> | <b>7 e 8</b> | <b>5</b> |
|--------------|----------|----------|----------|----------|----------|--------------|----------|
| <b>1.61</b>  | 138.435  | 111.060  | 54.414   | 36.391   | 12.231   | 30.159       | 28.713   |
| <b>2.01</b>  | 138.470  | 111.083  | 54.488   | 36.457   | 12.236   | 30.196       | 28.713   |
| <b>2.38</b>  | 138.429  | 111.269  | 54.162   | 36.434   | 12.172   | 30.159       | 28.831   |
| <b>2.60</b>  | 138.360  | 111.446  | 54.037   | 36.421   | 12.091   | 30.150       | 28.800   |
| <b>2.80</b>  | 138.379  | 111.556  | 53.798   | 36.471   | 12.026   | 30.133       | 28.786   |
| <b>3.00</b>  | 138.404  | 111.406  | 53.637   | 36.476   | 11.981   | 30.167       | 28.777   |
| <b>3.28</b>  | 138.430  | 111.657  | 53.330   | 36.546   | 11.869   | 30.040       | 28.791   |
| <b>3.58</b>  | 138.456  | 111.910  | 53.099   | 36.565   | 11.747   | 30.170       | 28.829   |
| <b>4.00</b>  | 138.411  | 112.161  | 52.938   | 36.594   | 11.752   | 30.112       | 28.795   |
| <b>4.53</b>  | 138.392  | 112.276  | 52.538   | 36.602   | 11.564   | 30.167       | 28.890   |
| <b>4.80</b>  | 138.389  | 112.334  | 52.664   | 36.542   | 11.537   | 30.170       | 28.950   |
| <b>5.10</b>  | 138.318  | 112.379  | 52.483   | 36.594   | 11.526   | 30.181       | 28.911   |
| <b>5.23</b>  | 138.397  | 112.418  | 52.357   | 36.620   | 11.522   | 30.269       | 28.922   |
| <b>5.30</b>  | 138.364  | 112.374  | 52.399   | 36.607   | 11.530   | 30.208       | 29.002   |
| <b>5.50</b>  | 138.347  | 112.390  | 52.397   | 36.600   | 11.473   | 30.174       | 28.974   |
| <b>6.10</b>  | 138.299  | 112.402  | 52.391   | 36.585   | 11.521   | 30.192       | 28.922   |
| <b>6.50</b>  | 138.292  | 112.422  | 52.357   | 36.630   | 11.493   | 30.173       | 28.937   |
| <b>7.20</b>  | 138.334  | 112.456  | 52.467   | 36.655   | 11.497   | 30.193       | 28.955   |
| <b>7.89</b>  | 138.193  | 112.392  | 52.355   | 36.622   | 11.502   | 30.178       | 28.981   |
| <b>8.21</b>  | 138.187  | 112.394  | 52.429   | 36.648   | 11.519   | 30.226       | 29.003   |
| <b>8.50</b>  | 138.269  | 112.399  | 52.367   | 36.569   | 11.506   | 30.192       | 28.954   |
| <b>8.77</b>  | 138.118  | 112.336  | 52.321   | 36.620   | 11.526   | 30.164       | 29.007   |
| <b>8.87</b>  | 137.953  | 112.360  | 52.406   | 36.634   | 11.558   | 30.199       | 28.922   |
| <b>9.12</b>  | 137.727  | 112.338  | 52.390   | 36.627   | 11.555   | 30.255       | 28.919   |
| <b>9.31</b>  | 137.468  | 112.260  | 52.468   | 36.574   | 11.577   | 30.168       | 28.988   |
| <b>9.40</b>  | 137.458  | 112.281  | 52.405   | 36.575   | 11.588   | 30.160       | 29.000   |
| <b>9.55</b>  | 137.252  | 112.213  | 52.489   | 36.655   | 11.626   | 30.173       | 28.981   |
| <b>9.80</b>  | 136.383  | 112.089  | 52.524   | 36.635   | 11.699   | 30.222       | 28.978   |
| <b>9.95</b>  | 136.305  | 112.049  | 52.555   | 36.662   | 11.736   | 30.204       | 29.018   |
| <b>10.03</b> | 135.938  | 111.998  | 52.470   | 36.615   | 11.755   | 30.212       | 29.008   |
| <b>10.20</b> | 135.050  | 111.871  | 52.574   | 36.636   | 11.872   | 30.224       | 29.090   |
| <b>10.50</b> | 134.805  | 111.803  | 52.647   | 36.682   | 11.897   | 30.235       | 29.068   |
| <b>10.74</b> | 134.964  | 111.849  | 52.574   | 36.680   | 11.894   | 30.181       | 29.048   |
| <b>11.00</b> | 134.493  | 111.788  | 52.632   | 36.698   | 11.927   | 30.229       | 29.094   |

**Table 2S.**  $^1\text{H}$  and  $^{13}\text{C}$  NMR titration of KC21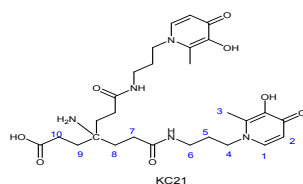 $^1\text{H}$  Chemical shifts (ppm) of KC21 ligand vs pH

| pH    | HN    | 2     | 1     | 4     | 6     | 3     | 5     | 8     |
|-------|-------|-------|-------|-------|-------|-------|-------|-------|
| 1.84  | 8.079 | 7.942 | 7.013 | 4.269 | 3.189 | 2.491 | 2.002 | 1.885 |
| 2.08  | 8.076 | 7.929 | 6.992 | 4.263 | 3.189 | 2.486 | 2.000 | 1.884 |
| 2.15  | 8.079 | 7.939 | 7.009 | 4.269 | 3.190 | 2.491 | 2.004 | 1.884 |
| 2.37  | 8.065 | 7.898 | 6.943 | 4.243 | 3.189 | 2.473 | 1.995 | 1.879 |
| 2.60  | 8.051 | 7.857 | 6.880 | 4.221 | 3.187 | 2.457 | 1.989 | 1.860 |
| 2.98  | 8.027 | 7.785 | 6.770 | 4.180 | 3.183 | 2.427 | 1.972 | 1.853 |
| 3.42  | 8.002 | 7.698 | 6.638 | 4.127 | 3.170 | 2.386 | 1.964 | 1.847 |
| 4.23  | 7.990 | 7.612 | 6.504 | 4.074 | 3.163 | 2.351 | 1.940 | 1.804 |
| 4.86  | 7.993 | 7.574 | 6.444 | 4.050 | 3.164 | 2.338 | 1.925 | 1.832 |
| 4.90  | 7.993 | 7.576 | 6.446 | 4.052 | 3.165 | 2.339 | 1.925 | 1.825 |
| 5.77  | 7.993 | 7.562 | 6.426 | 4.043 | 3.164 | 2.334 | 1.925 | 1.824 |
| 6.58  | 7.993 | 7.561 | 6.424 | 4.042 | 3.162 | 2.333 | 1.925 | 1.819 |
| 6.79  | 7.992 | 7.561 | 6.423 | 4.040 | 3.161 | 2.333 | 1.924 | 1.822 |
| 7.41  | 7.992 | 7.559 | 6.423 | 4.041 | 3.162 | 2.333 | 1.925 | 1.808 |
| 7.64  | 7.992 | 7.559 | 6.422 | 4.039 | 3.160 | 2.332 | 1.924 | 1.819 |
| 7.83  | 7.986 | 7.554 | 6.420 | 4.038 | 3.166 | 2.331 | 1.921 | 1.745 |
| 8.14  | 7.983 | 7.555 | 6.421 | 4.039 | 3.167 | 2.332 | 1.921 | 1.749 |
| 8.42  | 7.965 | 7.547 | 6.415 | 4.034 | 3.161 | 2.326 | 1.920 | 1.720 |
| 8.76  |       | 7.543 | 6.415 | 4.035 | 3.164 | 2.329 | 1.922 | 1.675 |
| 9.03  |       | 7.525 | 6.408 | 4.032 | 3.163 | 2.326 | 1.919 | 1.610 |
| 9.30  |       | 7.499 | 6.392 | 4.017 | 3.151 | 2.313 | 1.917 | 1.564 |
| 9.95  |       | 7.446 | 6.369 | 4.005 | 3.144 | 2.302 | 1.908 | 1.548 |
| 10.09 |       | 7.413 | 6.358 | 4.005 | 3.148 | 2.300 | 1.908 | 1.550 |
| 10.22 |       | 7.386 | 6.347 | 3.997 | 3.146 | 2.294 | 1.900 | 1.543 |
| 10.76 |       | 7.318 | 6.318 | 3.985 | 3.140 | 2.283 | 1.899 | 1.547 |
| 11.17 |       | 7.352 | 6.314 | 3.985 | 3.138 | 2.281 | 1.898 | 1.546 |
| 11.72 |       | 7.226 | 6.277 | 3.965 | 3.131 | 2.267 | 1.891 | 1.555 |

<sup>13</sup>C Chemical shifts (ppm) of KC21 ligand vs pH

| pH    | 2       | 1       | 4      | 6      | 3      | 5      | 8      |
|-------|---------|---------|--------|--------|--------|--------|--------|
| 1.84  | 138.476 | 111.102 | 54.281 | 36.403 | 12.207 | 28.702 | 30.723 |
| 2.08  | 138.441 | 111.149 | 54.284 | 36.406 | 12.166 | 28.739 | 30.743 |
| 2.15  | 138.441 | 111.104 | 54.333 | 36.388 | 12.210 | 28.77  | 30.878 |
| 2.37  | 138.451 | 111.317 | 54.140 | 36.388 | 12.118 | 28.803 | 30.738 |
| 2.60  | 138.374 | 111.389 | 53.991 | 36.447 | 12.078 | 28.752 | 30.716 |
| 2.98  | 138.478 | 111.660 | 53.704 | 36.552 | 11.955 | 28.735 | 30.785 |
| 3.42  | 138.480 | 111.925 | 53.282 | 36.621 | 11.794 | 28.771 | 30.809 |
| 4.23  | 138.422 | 112.307 | 52.797 | 36.633 | 11.631 | 28.744 | 30.976 |
| 4.86  | 138.469 | 112.403 | 52.535 | 36.657 | 11.557 | 28.817 | 30.965 |
| 4.90  | 138.404 | 112.398 | 52.531 | 36.720 | 11.560 | 28.831 | 30.963 |
| 5.77  | 138.430 | 112.454 | 52.487 | 36.699 | 11.541 | 28.798 | 31.014 |
| 6.58  | 138.440 | 112.441 | 52.452 | 36.762 | 11.538 | 28.834 | 31.069 |
| 6.79  | 138.447 | 112.419 | 52.437 | 36.684 | 11.520 | 28.852 | 30.976 |
| 7.41  | 138.432 | 112.455 | 52.490 | 36.698 | 11.531 | 28.844 | 31.184 |
| 7.64  | 138.392 | 112.456 | 52.466 | 36.746 | 11.533 | 28.852 | 31.249 |
| 7.83  | 138.368 | 112.454 | 52.467 | 36.644 | 11.540 | 28.860 | 31.791 |
| 8.14  | 138.385 | 112.445 | 52.462 | 36.664 | 11.523 | 28.814 | 31.899 |
| 8.42  | 138.365 | 112.452 | 52.438 | 36.634 | 11.552 | 28.863 | 32.262 |
| 8.76  | 138.142 | 112.398 | 52.487 | 36.666 | 11.559 | 28.867 | 32.768 |
| 9.03  | 137.915 | 112.332 | 52.591 | 36.643 | 11.590 | 28.858 | 33.440 |
| 9.30  | 137.597 | 112.276 | 52.488 | 36.588 | 11.570 | 28.969 | 34.003 |
| 9.95  | 136.804 | 112.197 | 52.526 | 36.566 | 11.677 | 28.996 | 34.287 |
| 10.09 | 136.039 | 112.043 | 52.628 | 36.601 | 11.756 | 28.964 | 34.449 |
| 10.22 | 135.685 | 111.981 | 52.594 | 36.651 | 11.798 | 28.963 | 34.446 |
| 10.76 | 134.671 | 111.839 | 52.684 | 36.645 | 11.923 | 29.032 | 34.622 |
| 11.17 | 134.397 | 111.781 | 52.727 | 36.675 | 11.925 | 29.078 | 34.668 |
| 11.72 | 132.948 | 111.519 | 52.784 | 36.582 | 12.089 | 29.121 | 34.738 |

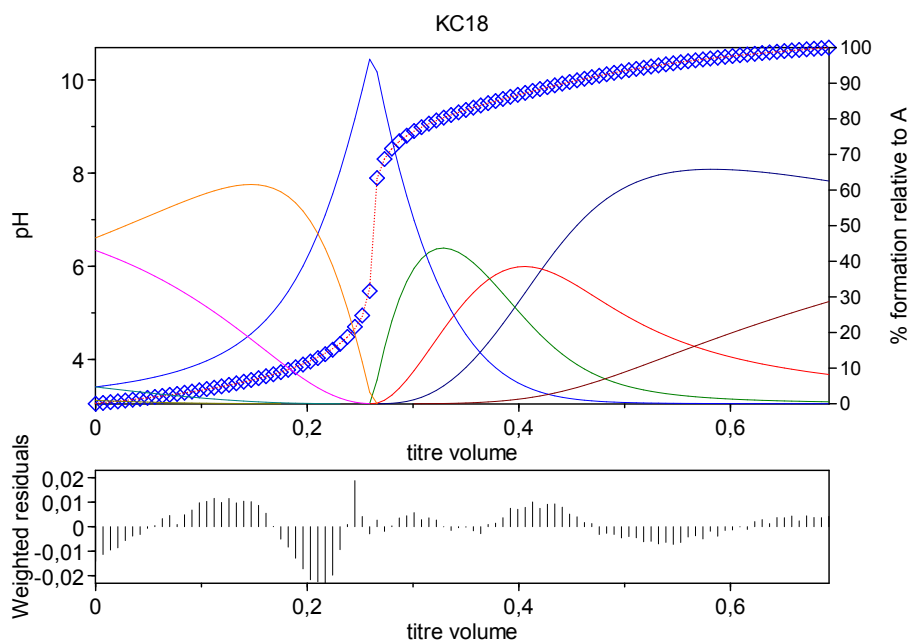

**Figure 1S.** Potentiometric titration of KC18 (HyperQuad screenshot)

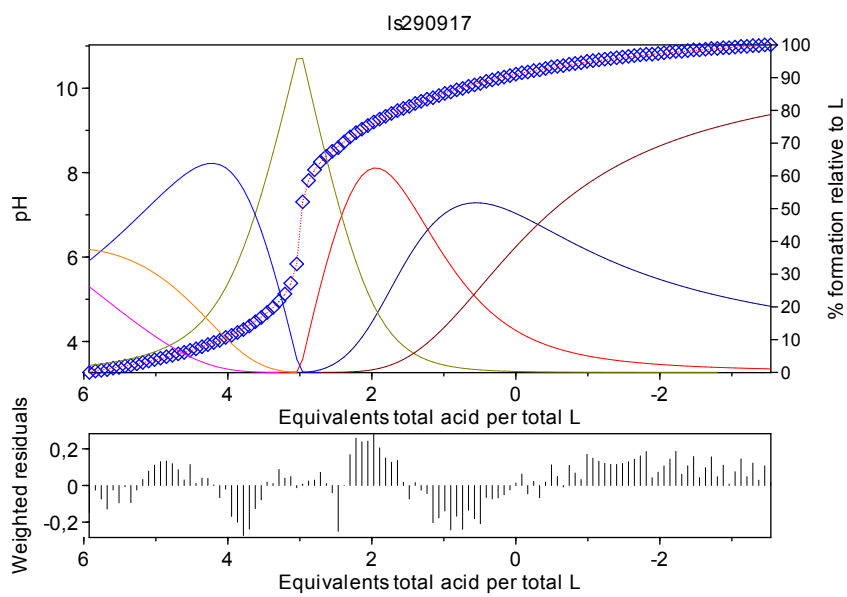

**Figure 2S.** Potentiometric titration of KC21 (HyperQuad screenshot)

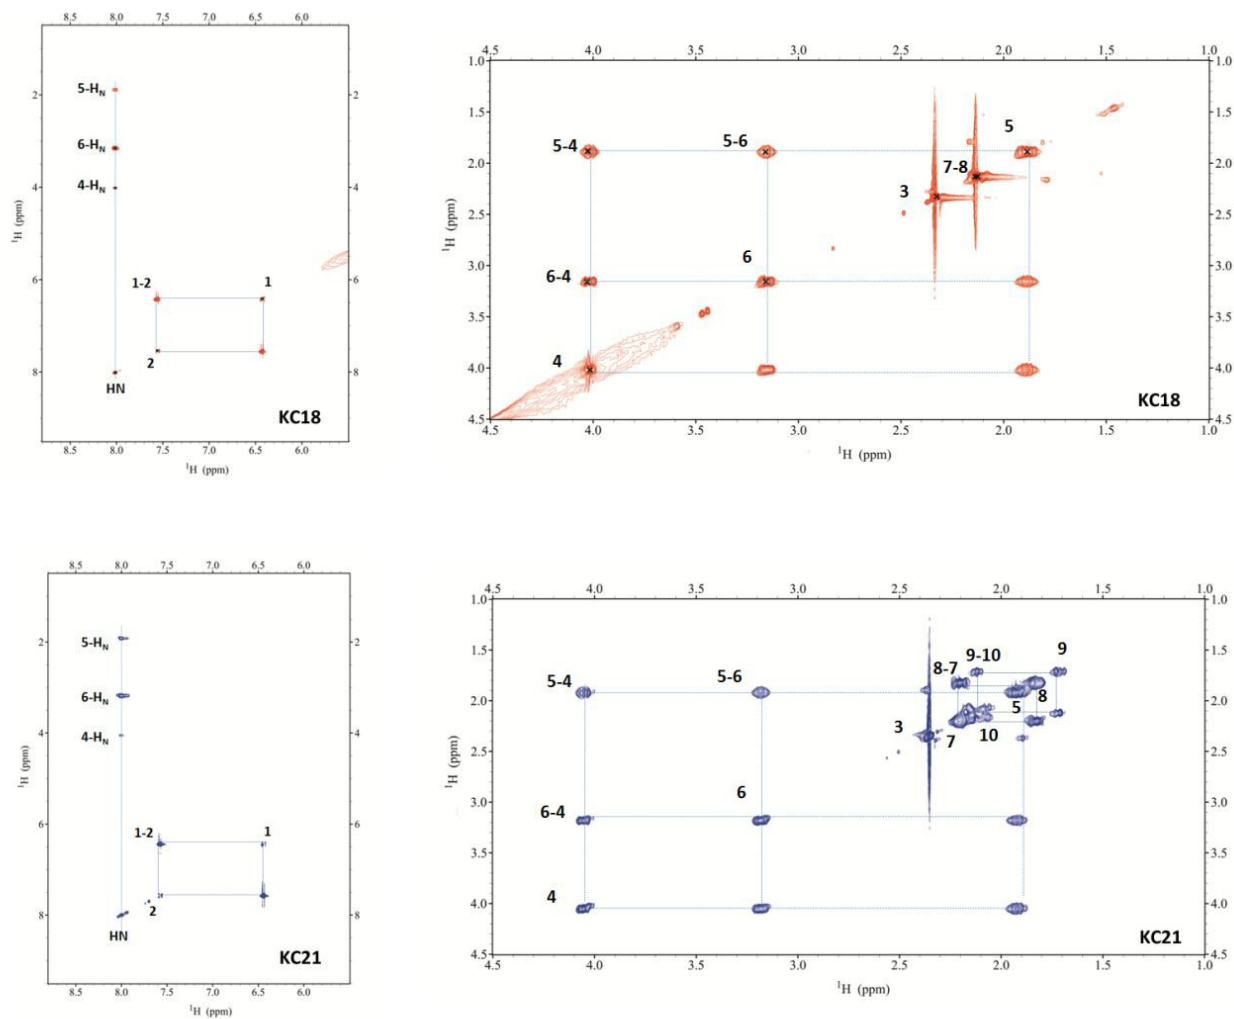

**Figure 3S.** Aromatic (left) and aliphatic (right) region of  $^1\text{H}$ - $^1\text{H}$  TOCSY spectra for KC18 and KC21 ligands with the relative proton and correlation assignments.

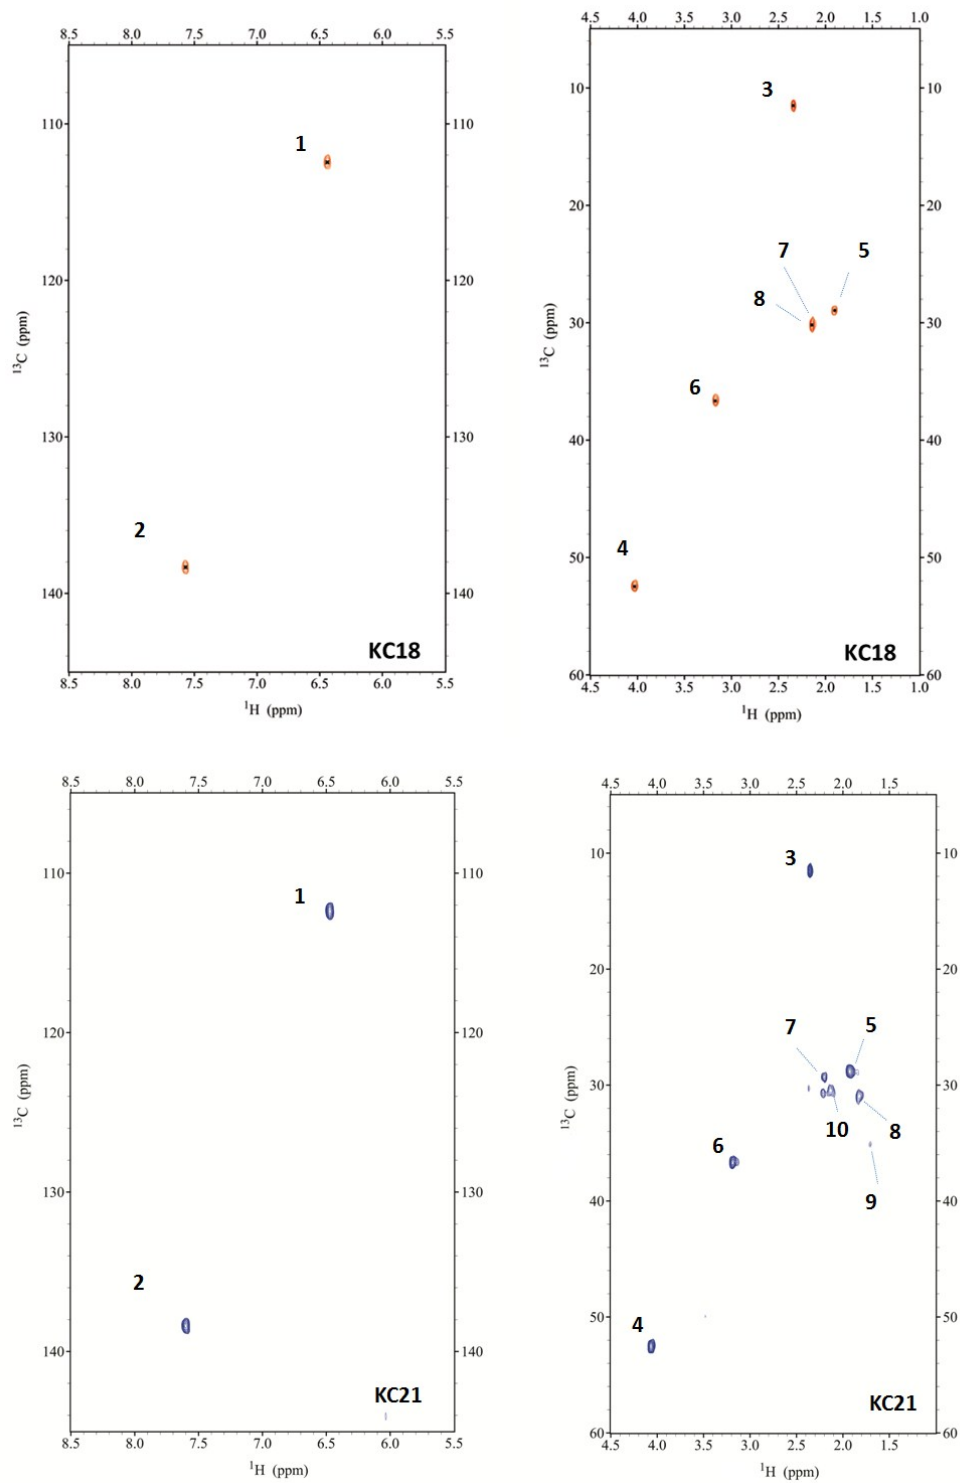

**Figure 4S.** Aromatic (left) and aliphatic (right) region of  $^1\text{H}$ - $^{13}\text{C}$  HSQC spectra for KC18 and KC21 ligands with the relative H-C correlation assignments.



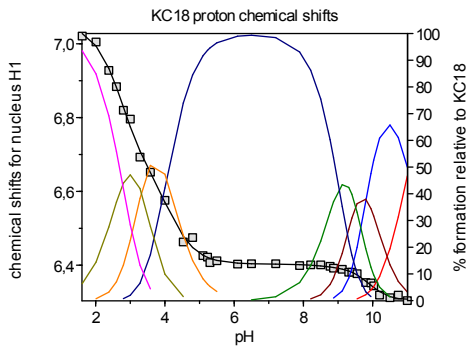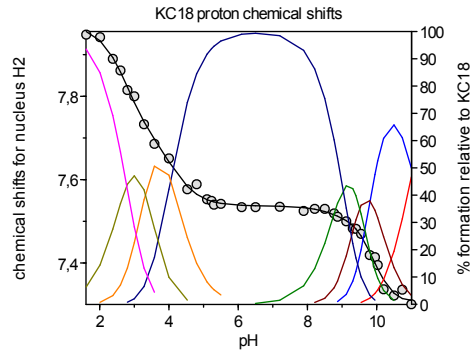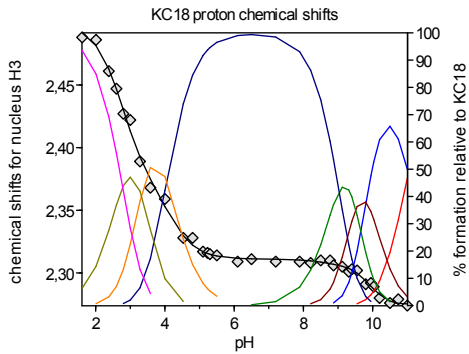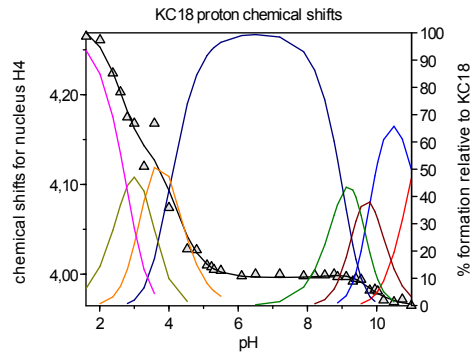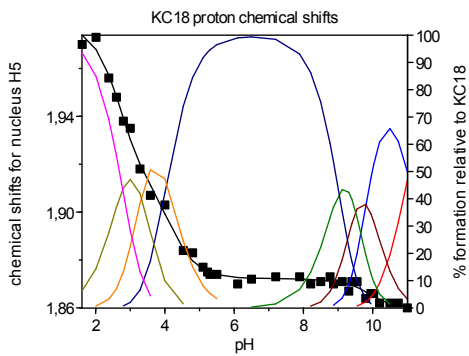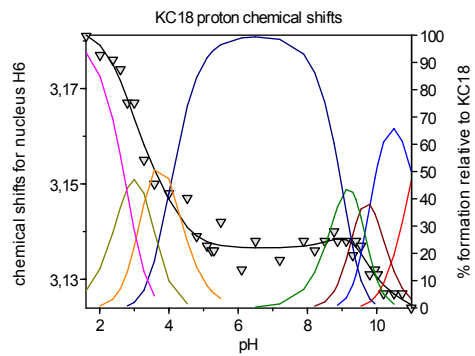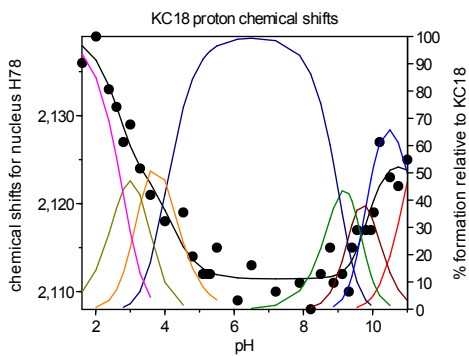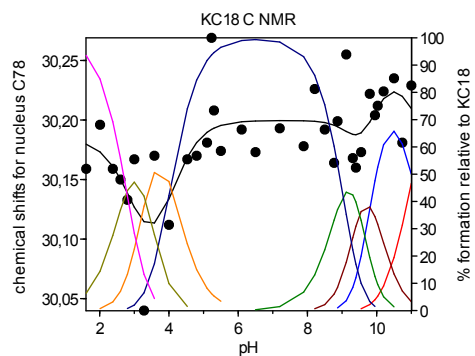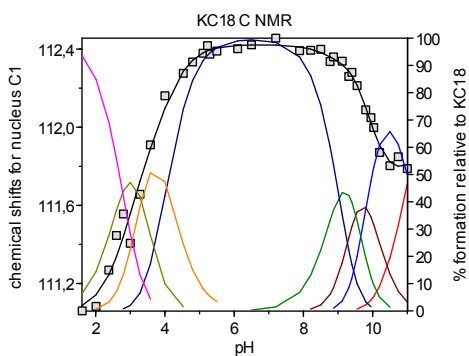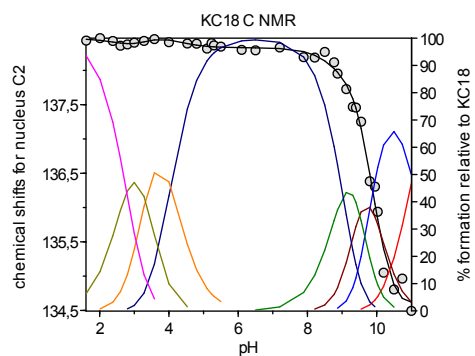

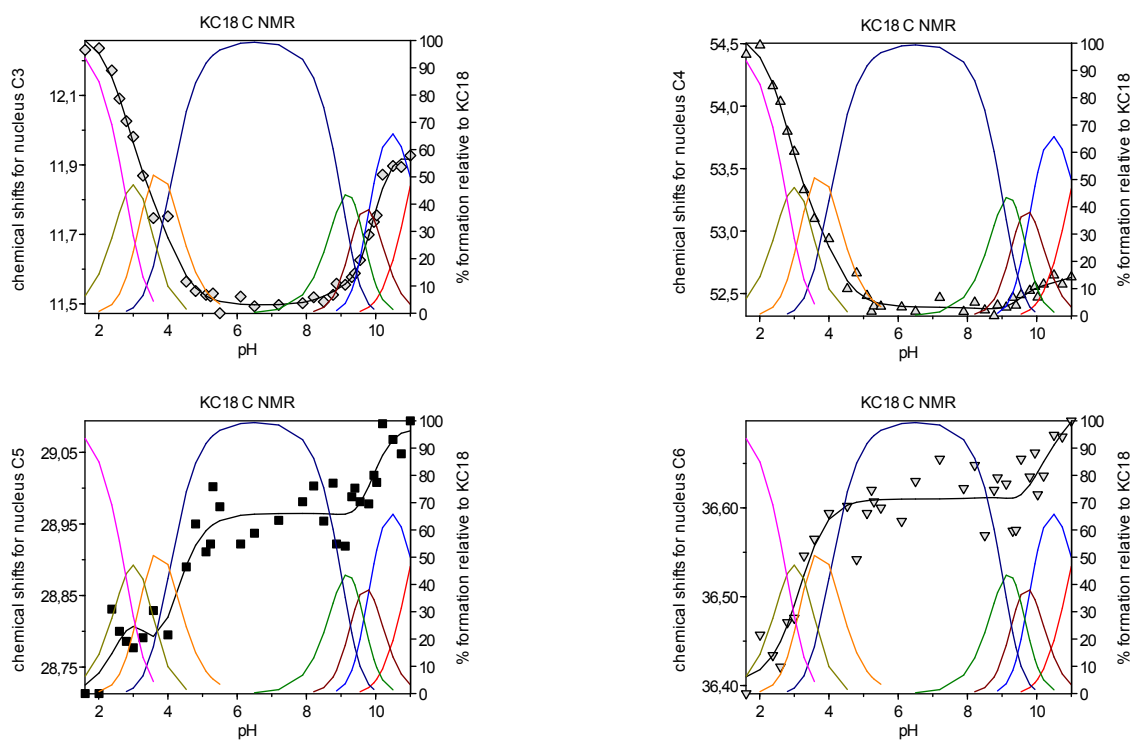

**Figure 5S.** Trend of chemical shifts of KC18 vs pH, overlapping speciation plots (HypNMR).

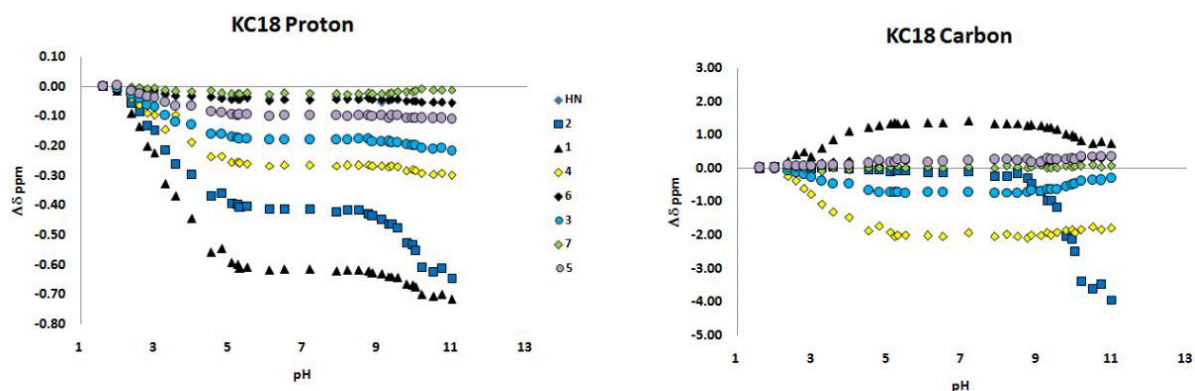

**Figure 6S.** Trend of  $^1\text{H}$  (left) and  $^{13}\text{C}$  (right) chemical shifts vs pH for KC18 ligand calculated using the formula  $\Delta\delta = \delta_{\text{pHi}} - \delta_{\text{pH0}}$  ppm.  $\delta_{\text{pH0}}$  is the value of the proton or carbon chemical shift at the first value of pH whereas  $\delta_{\text{pHi}}$  are the subsequent values at the following pH's.

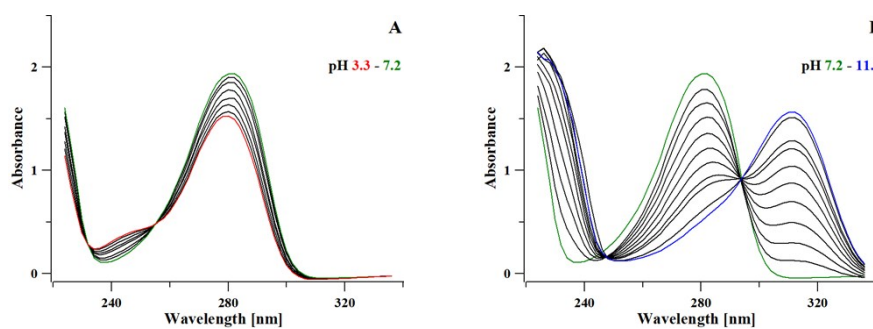

**Figure 7S.** Representative spectra (0.2 cm optical path) collected during the titration of KC21 ligand  $10^{-3}$  M with NaOH 0.1 M (A) from pH 3.3 to 7.2; (B) from pH 7.2 to 11.0

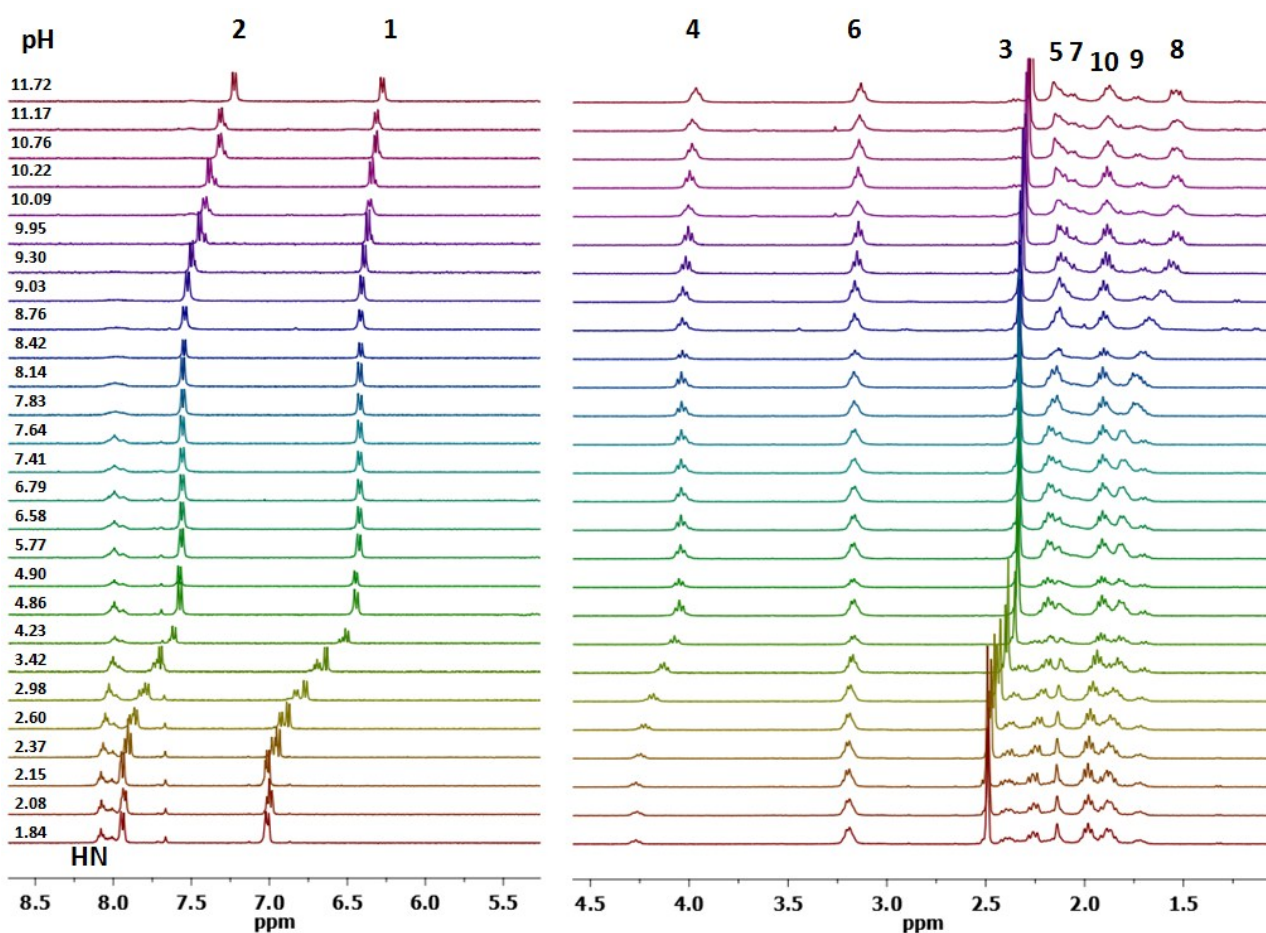

**Figure 8S.**  $^1\text{H}$  NMR spectra of KC21 ligand as a function of pH.

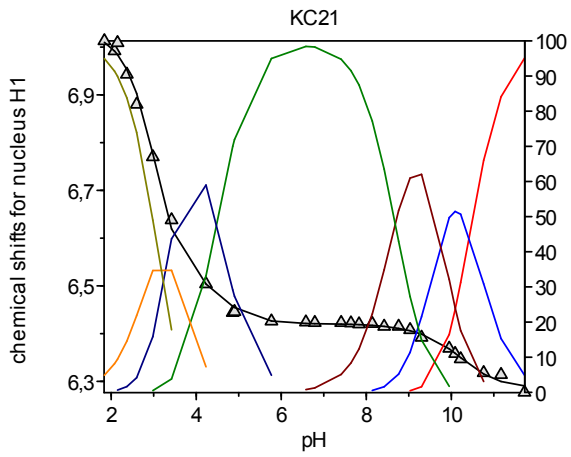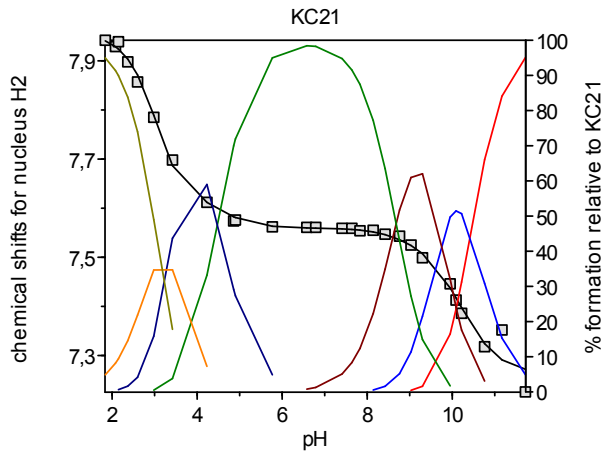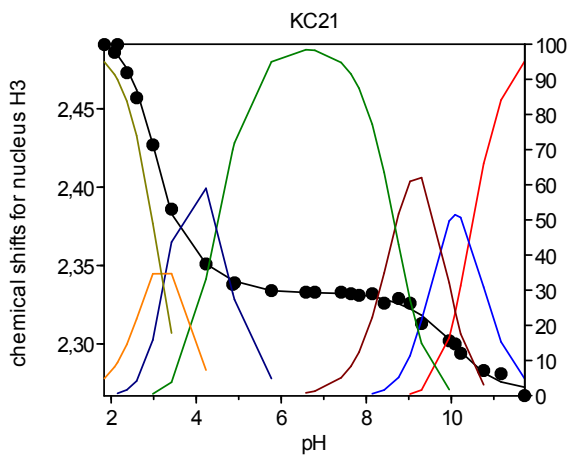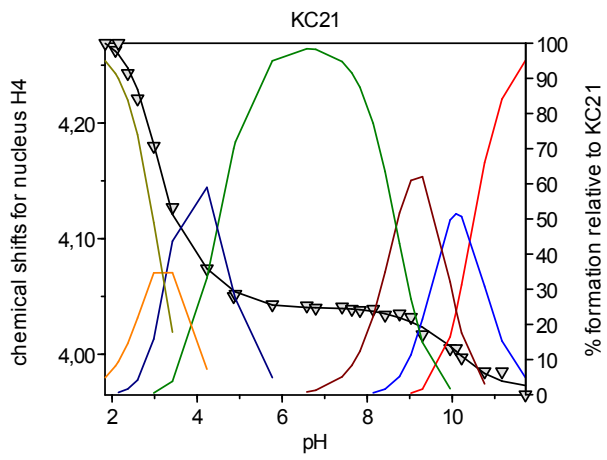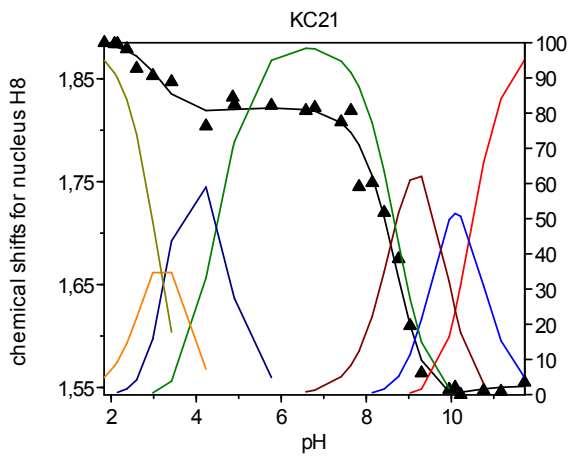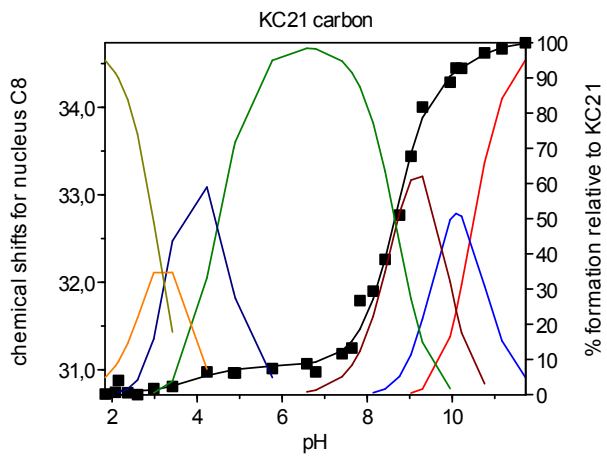

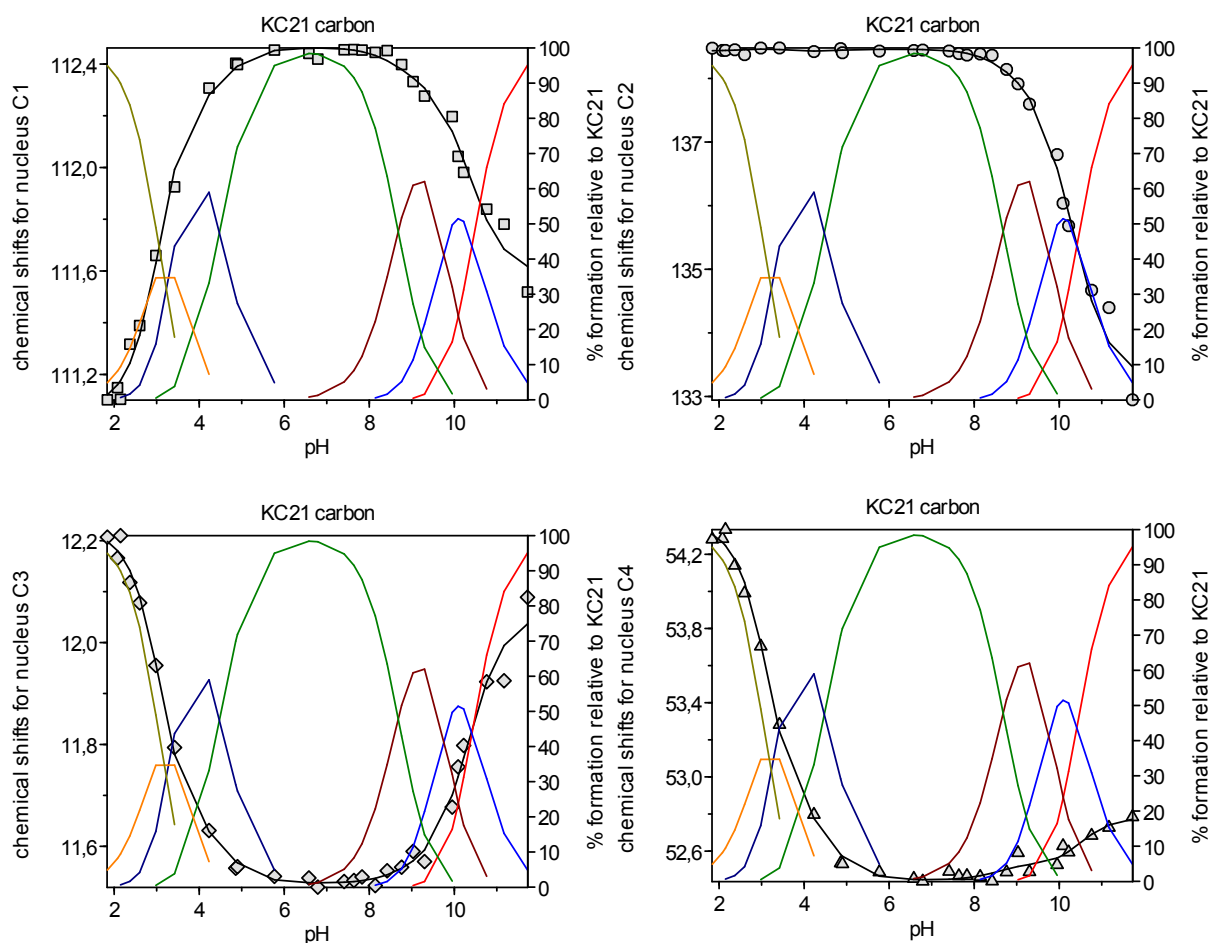

**Figure 9S.** Trend of chemical shifts of KC21 vs pH, overlapping speciation plots (HypNMR).

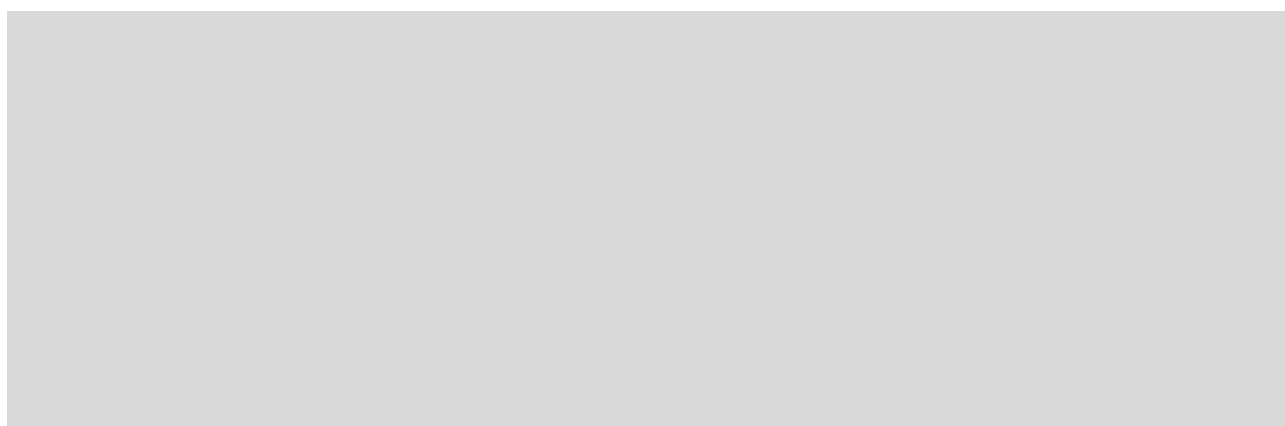

**Figure 10S.** Trend of  $^1\text{H}$  (left) and  $^{13}\text{C}$  (right) chemical shifts vs pH for KC21 ligand calculated using the formula  $\Delta\delta = \delta_{\text{pHi}} - \delta_{\text{pH0}}$  ppm; where  $\delta_{\text{pH0}}$  is the value of the proton or carbon chemical shift at the first value of pH whereas  $\delta_{\text{pHi}}$  are the subsequent values at the following pH's.

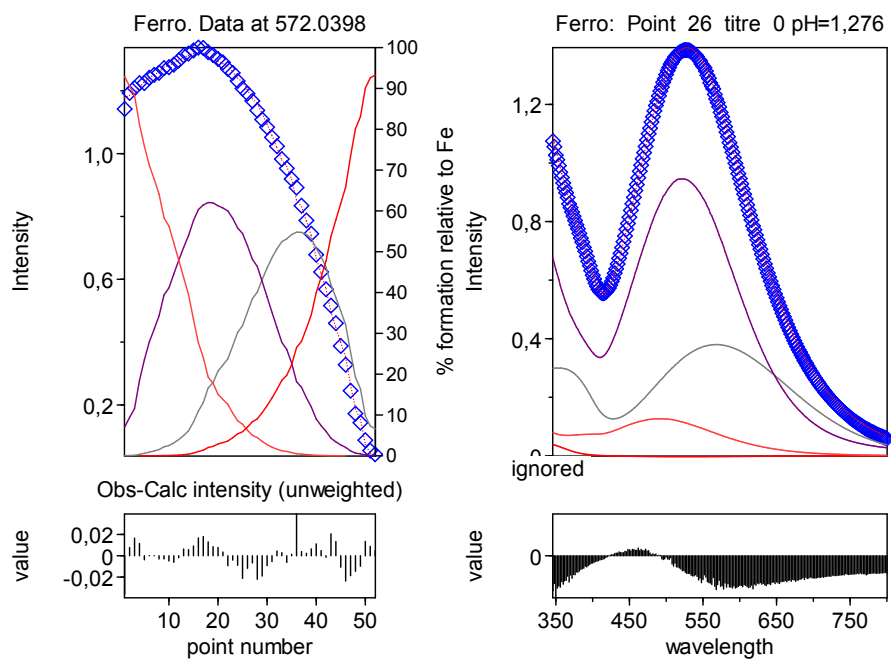

**Fig. 11S.** Representative HypSpec screenshot from the spectrophotometric titration of the system  $\text{Fe}^{3+}$ -KC18.

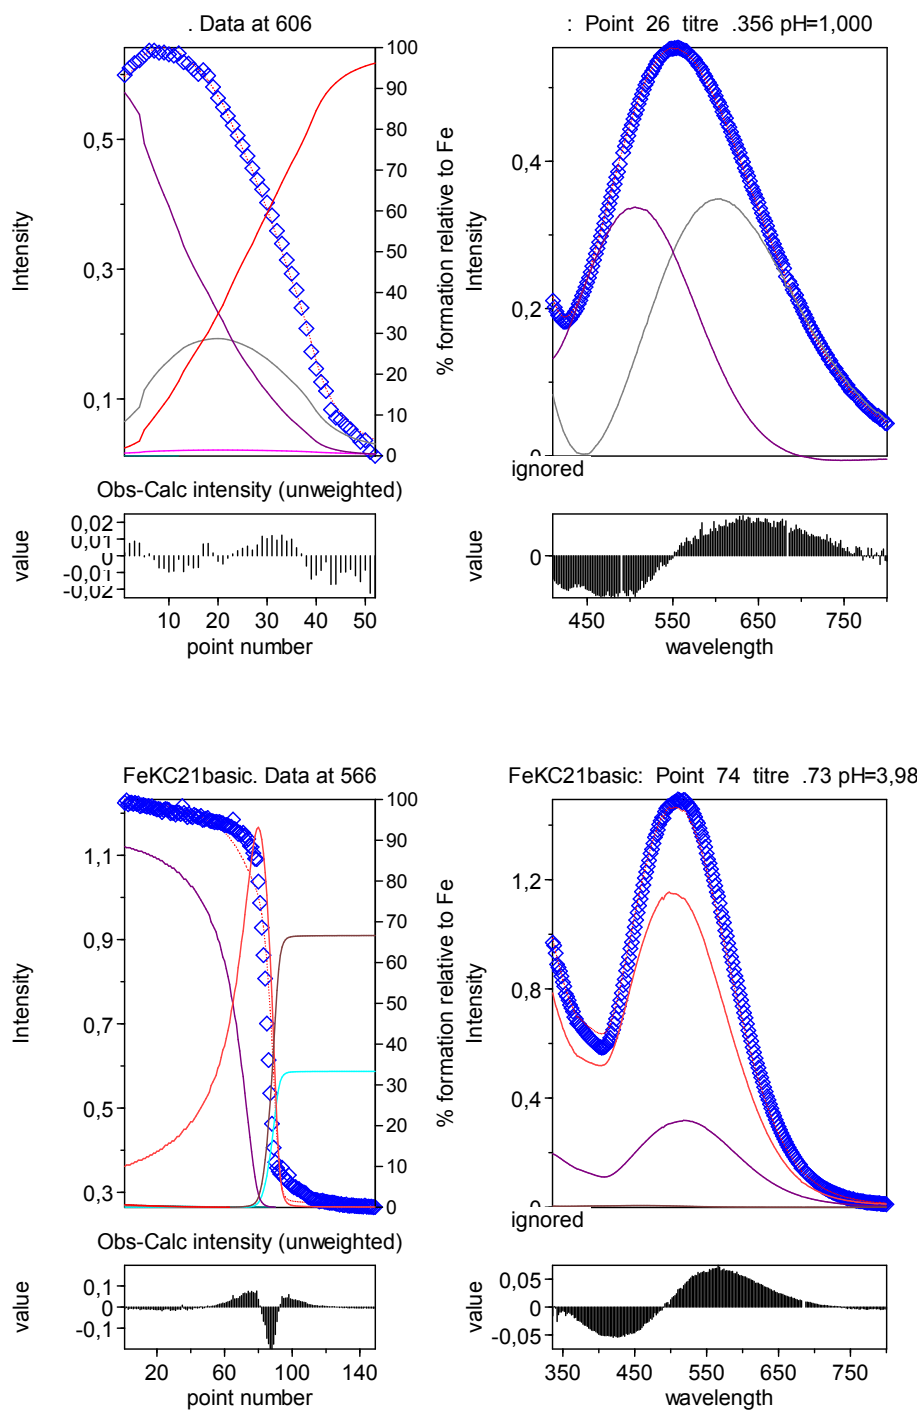

**Fig. 12S.** Representative HypSpec screenshots from the spectrophotometric titrations of the system Fe<sup>3+</sup>-KC21.

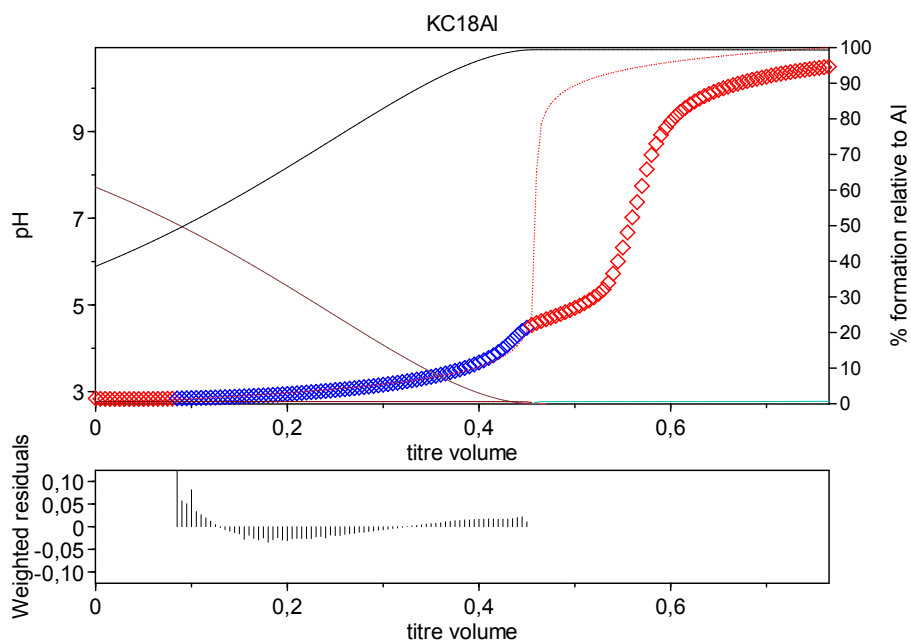

**Figure 13S.** Potentiometric titration of the system KC18-Al<sup>3+</sup> (HyperQuad screenshot)

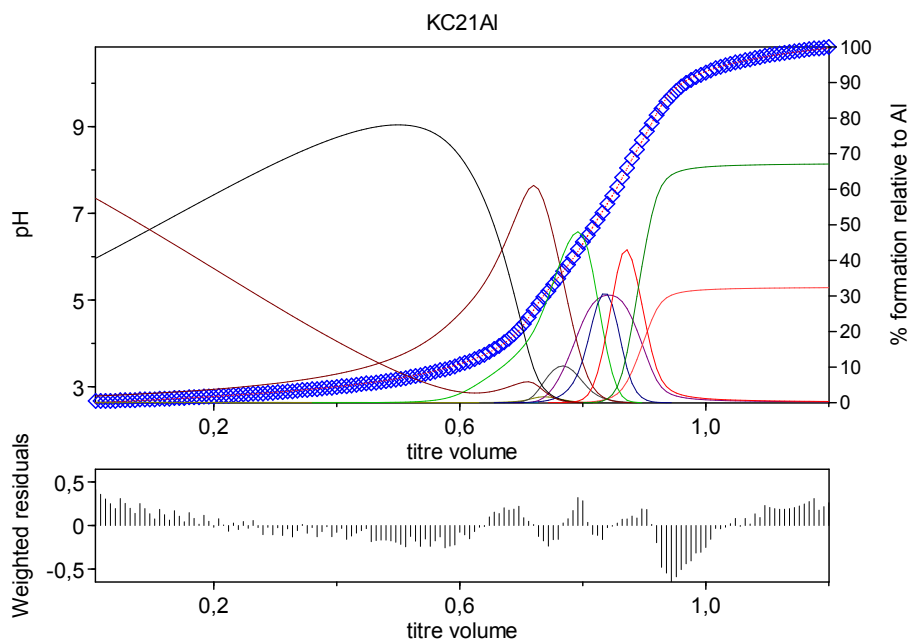

**Figure 14S.** Potentiometric titration of the system KC21-Al<sup>3+</sup> (HyperQuad screenshot)



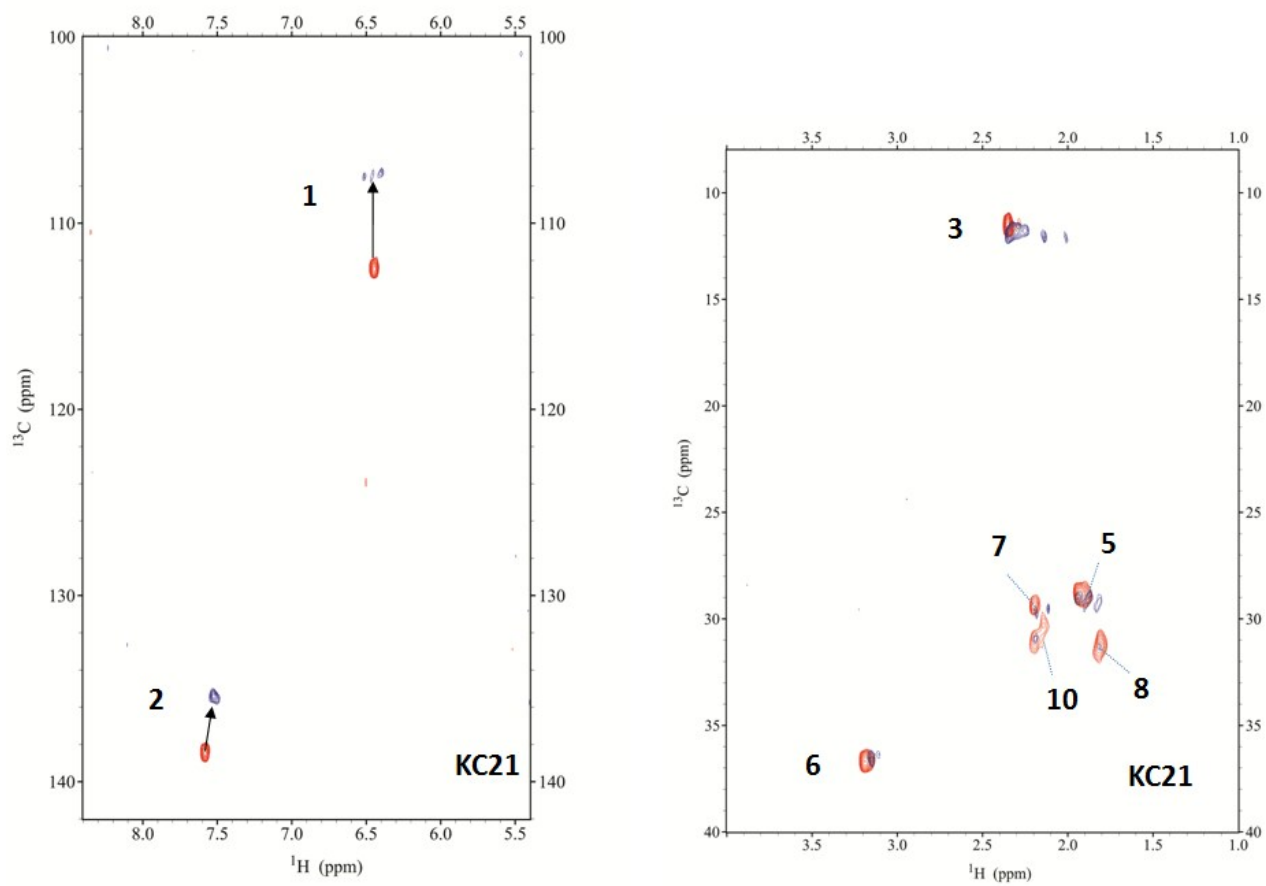

**Fig. 15S.** Aromatic (left) and aliphatic (right) region of  $^1\text{H}$ - $^{13}\text{C}$  HSQC spectra for KC21: $\text{Al}^{3+}$  system at 1:1 molar ratio at pH 7.5.

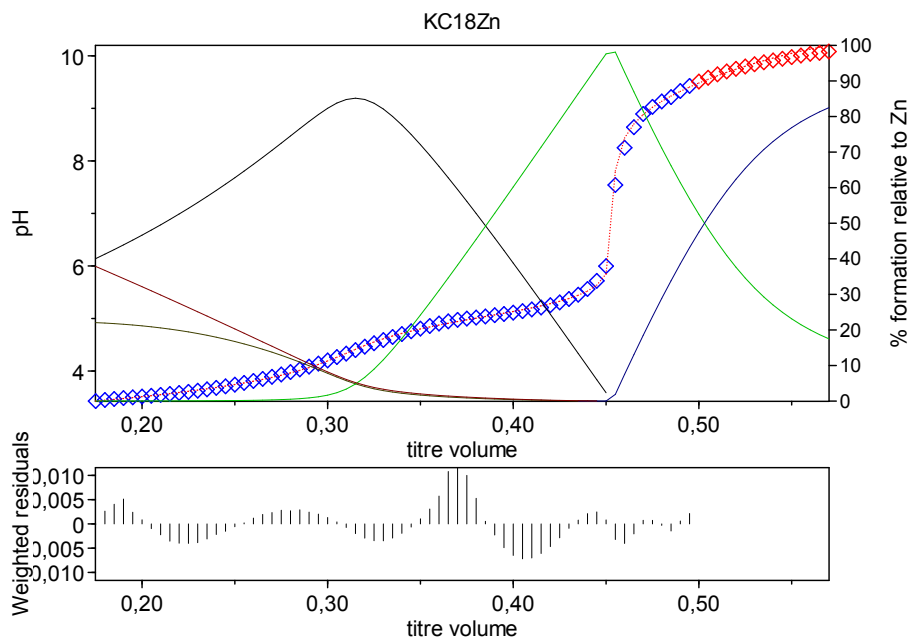

Fig. 16S. Potentiometric titration of the system KC18-Zn<sup>2+</sup> (HyperQuad screenshot)

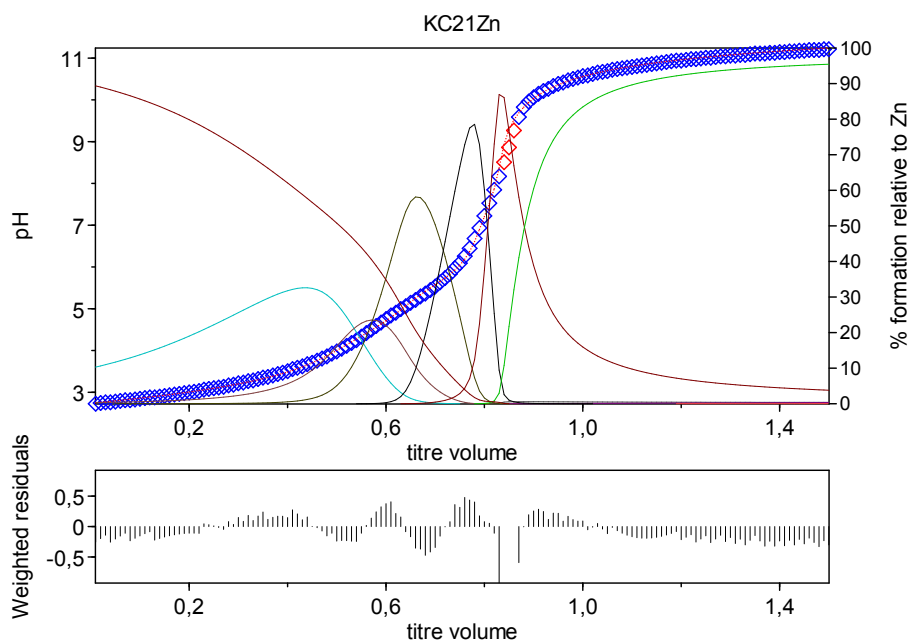

Fig. 17S. Potentiometric titration of the system KC21-Zn<sup>2+</sup> (HyperQuad screenshot)

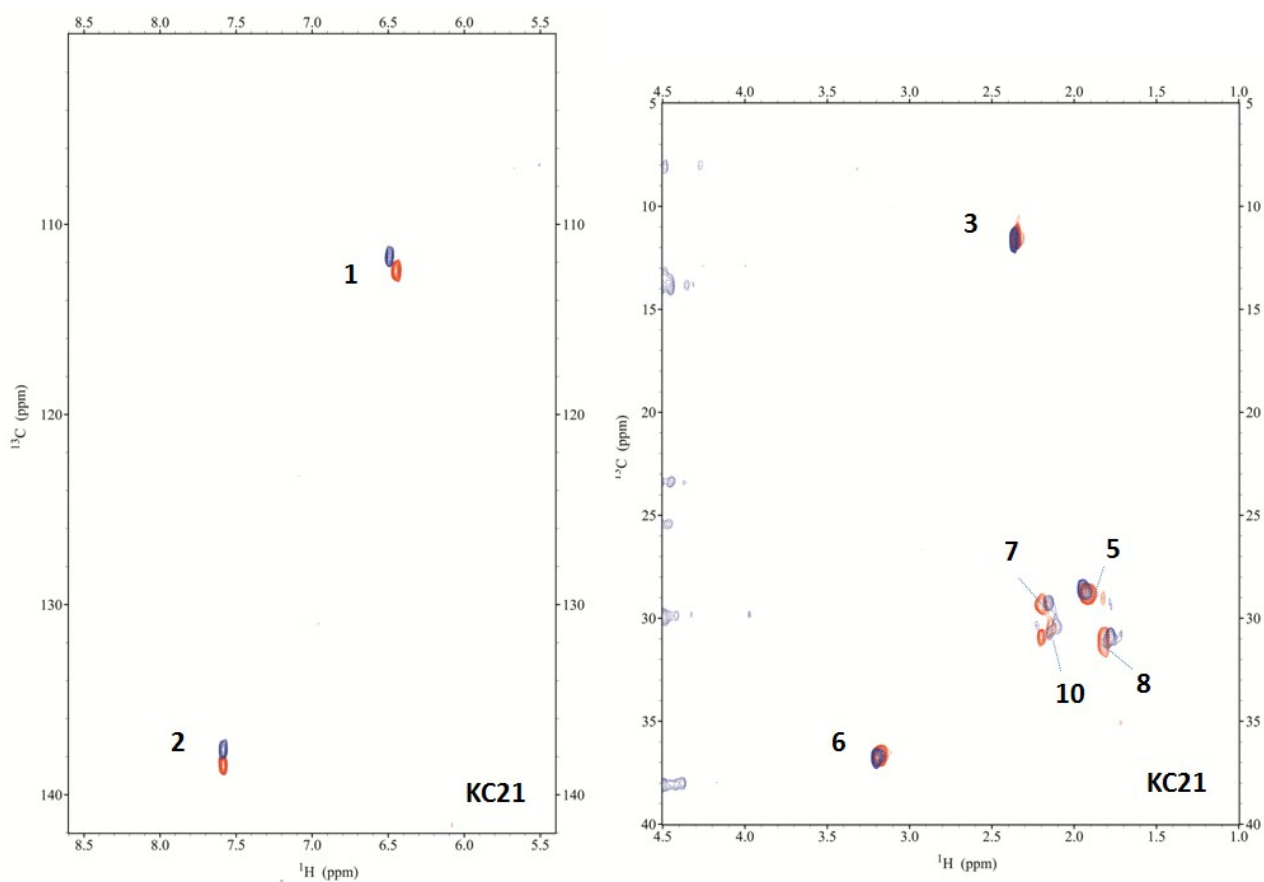

**Figure 18S.** Aromatic (left) and aliphatic (right) region of <sup>1</sup>H-<sup>13</sup>C HSQC spectra for KC21:Zn<sup>2+</sup> system at 1:1 molar ratio at pH 5.8.

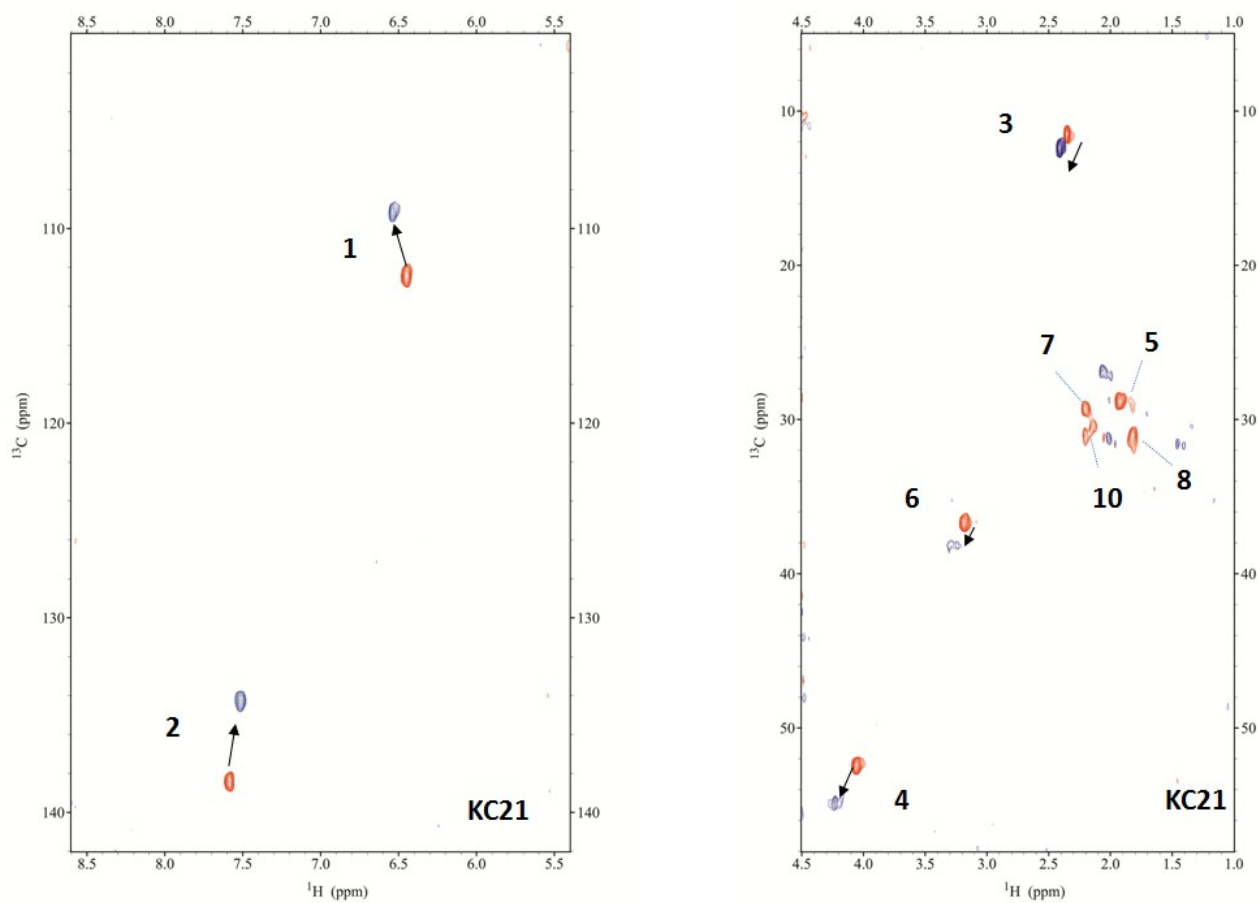

**Figure 19S.** Aromatic (left) and aliphatic (right) region of  $^1\text{H}$ - $^{13}\text{C}$  HSQC spectra for KC21: $\text{Zn}^{2+}$  system at 1:1 molar ratio at pH 7.5.
